# Supplementary material for: Phasevarions Mediate Random Switching of Gene Expression in Pathogenic Neisseria
Source: PubMed Central journal article supplement (PMC2667262; doi:10.1371/journal.ppat.1000400), 2009-04-24
Supplement: ppat.1000400.s005.pdf [file ppat.1000400.s005.pdf]

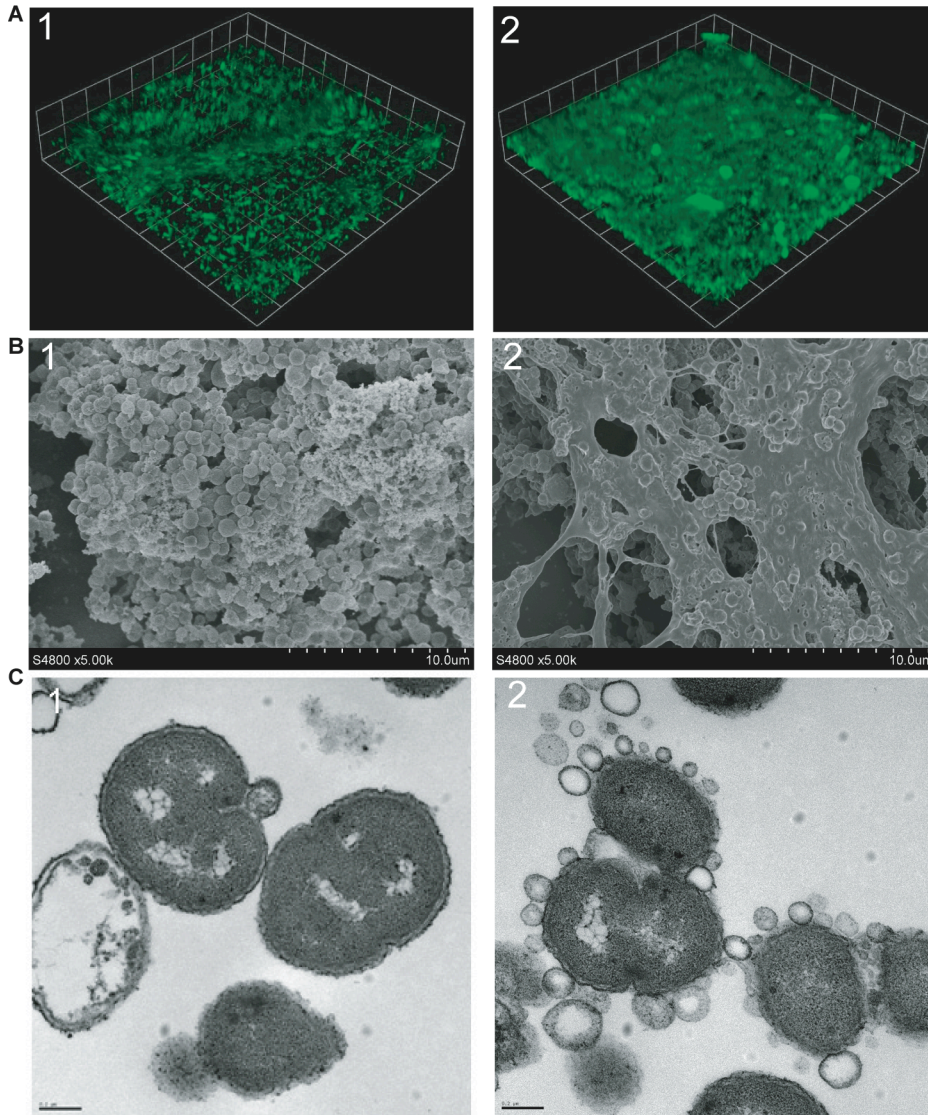

| COMSTAT parameter                         | FA1090 <i>modA13</i> ON | FA1090 <i>modA13::kan</i> | P-value |
|-------------------------------------------|-------------------------|---------------------------|---------|
| Biomass ( $\mu\text{M}^3/\mu\text{M}^2$ ) | 5.21 $\pm$ 2.2          | 23.9 $\pm$ 7.0            | 0.0002  |
| Average Thickness ( $\mu\text{M}$ )       | 31.7 $\pm$ 8.9          | 63.8 $\pm$ 8.2            | 0.0003  |
| Maximum Thickness ( $\mu\text{M}$ )       | 89.0 $\pm$ 22.4         | 74.7 $\pm$ 10.9           | 0.1564  |
