# Supplementary material for: Phasevarions Mediate Random Switching of Gene Expression in Pathogenic Neisseria
Source: PubMed Central journal article supplement (PMC2667262; doi:10.1371/journal.ppat.1000400), 2009-04-24
Supplement: ppat.1000400.s006.pdf [file ppat.1000400.s006.pdf]

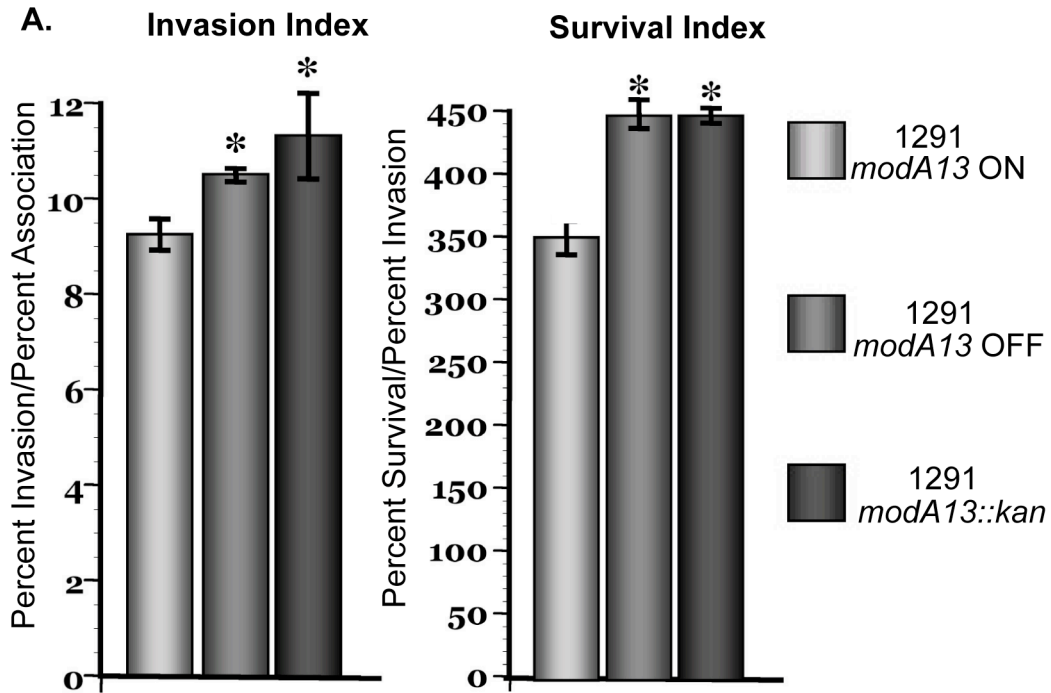

**B.**

| 1291              |       | Ratio ON/OFF |                    |                    |
|-------------------|-------|--------------|--------------------|--------------------|
|                   |       | Inoculum     | Invasion           | Survival           |
| <i>modA13</i> ON  | % ON  | 93.01        | 65.18              | 75.82              |
|                   | % OFF | 6.99         | 34.82 <sup>†</sup> | 24.18 <sup>†</sup> |
| <i>modA13</i> OFF | % ON  | 5.03         | 5.82               | 5.78               |
|                   | % OFF | 94.97        | 94.18              | 94.22              |
