# Supplementary material for: Phasevarions Mediate Random Switching of Gene Expression in Pathogenic Neisseria
Source: PubMed Central journal article supplement (PMC2667262; doi:10.1371/journal.ppat.1000400), 2009-04-24

**A** QRT-PCR of *modA13* and *modA11*

|                  | Fold difference (Iron Replete / Iron Deplete) | P-value |
|------------------|-----------------------------------------------|---------|
| <i>modA13</i> ON | 1.0                                           | 0.241   |
| <i>modA11</i> ON | 2.4                                           | 0.007   |

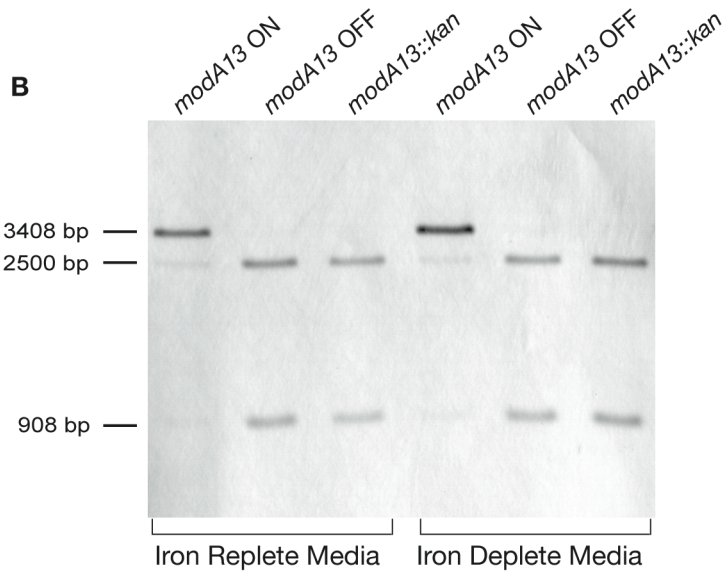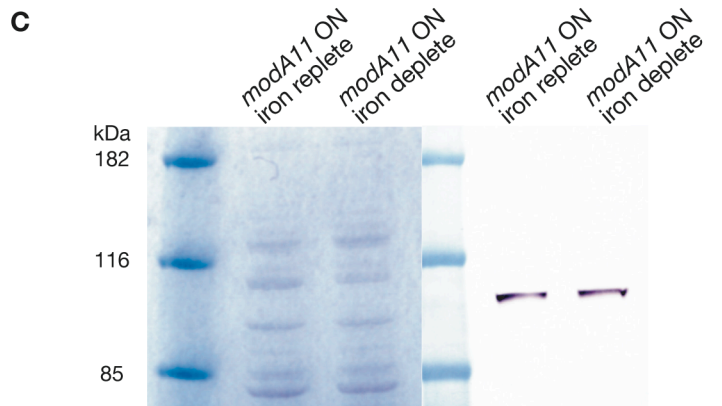

Supplement: ppat.1000400.s008.pdf [file ppat.1000400.s008.pdf]
