# Supplementary material for: Phasevarions Mediate Random Switching of Gene Expression in Pathogenic Neisseria
Source: PubMed Central journal article supplement (PMC2667262; doi:10.1371/journal.ppat.1000400), 2009-04-24
Supplement: ppat.1000400.s010.pdf [file ppat.1000400.s010.pdf]

**Table S2. *Mod* alleles and repeat numbers for *N. gonorrhoeae* clinical isolate strains**

| Strain               | Pathology <sup>a</sup> | <i>modA</i> allele <sup>c</sup> | Repeats AGCC <sup>b</sup> | <i>modB</i> allele <sup>c</sup> | Repeats CCCAA <sup>b</sup> |
|----------------------|------------------------|---------------------------------|---------------------------|---------------------------------|----------------------------|
| FA1090               | DGI                    | <i>modA13</i>                   | 19 (ON)                   | <i>modB1</i>                    | 12 (ON)                    |
| 01G1052              | MI                     | <i>modA13</i>                   | 15 (OFF)                  | <i>modB1</i>                    | 16 (OFF)                   |
| 01G1370 <sup>d</sup> | MI                     | <i>modA13</i>                   | 13 (ON)                   | NA                              | NA                         |
| 01G0957              | DGI                    | <i>modA12</i>                   | 13 (ON)                   | <i>modB1</i>                    | 16 (OFF)                   |
| 90/G747              | DGI                    | <i>modA13</i>                   | 17 (OFF)                  | <i>modB1</i>                    | 8 (OFF)                    |
| 94G163               | MI                     | <i>modA13</i>                   | 17 (OFF)                  | <i>modB1</i>                    | 31 (OFF)                   |
| 98G1131              | DGI                    | <i>modA12</i>                   | 20 (OFF)                  | <i>modB1</i>                    | 20 (OFF)                   |
| 00G0794 <sup>d</sup> | MI                     | <i>modA12</i>                   | 33 (OFF)                  | <i>modB1</i>                    | 8 (OFF)                    |
| 01D064               | MI                     | <i>modA12</i>                   | 17 (OFF)                  | <i>modB1</i>                    | 21 (ON)                    |
| 02D004               | DGI                    | <i>modA12</i>                   | 26 (OFF)                  | <i>modB1</i>                    | 17(OFF)                    |
| 02D156               | DGI                    | <i>modA12</i>                   | 15 (OFF)                  | <i>modB1</i>                    | 2 (OFF)                    |
| 02W001               | DGI                    | <i>modA13</i>                   | 10 (ON)                   | <i>modB1</i>                    | 19 (OFF)                   |
| 98D159               | DGI                    | <i>modA12</i>                   | 27 (OFF)                  | <i>modB1</i>                    | 16 (OFF)                   |
| 97D040               | DGI                    | <i>modA12</i>                   | 20 (OFF)                  | <i>modB1</i>                    | 12 (ON)                    |
| 97D059               | MI                     | <i>modA12</i>                   | 24 (OFF)                  | <i>modB1</i>                    | 2 (OFF)                    |
| 96D551               | MI                     | <i>modA12</i>                   | 25 (ON)                   | <i>modB1</i>                    | 16 (OFF)                   |
| 1291                 | UG                     | <i>modA13</i>                   | 15 (OFF)                  | <i>modB1</i>                    | 7 (OFF)                    |
| MS11                 | UG                     | <i>modA13</i>                   | 26 (OFF)                  | <i>modB1</i>                    | 8 (OFF)                    |

<sup>a</sup> DGI: disseminated gonococcal infection clinical isolates, MI: asymptomatic carriage or mucosal gonorrhoeae infection clinical isolates, UG: uncomplicated gonorrhoeae

<sup>b</sup> Number and expression state of repeats within the *mod* gene; in-frame (ON) or out-of-frame (OFF)

<sup>c</sup> A strain was defined as having the *modA13* allele if the DNA recognition region was  $\geq 95\%$  identical at the nucleotide level to the *modA13* gene of *N. gonorrhoeae* strain FA1090 (NGO0641), and as *modA12* allele if the DNA recognition region was  $\geq 95\%$  identical at the nucleotide level to the *modA12* gene of *N. meningitidis* strain Z2491 (NMA1589/90). A strain was defined as having the *modB1* allele if the DNA recognition region was  $\geq 95\%$  identical at the nucleotide level to the *modB1* gene of *N. gonorrhoeae* strain FA1090 (NGO0545), see Figure 1.

NA- *modB* gene not present,

<sup>d</sup> 750 bp in-frame deletion in *res*

ND: not determined

Refer to Figure 1 and to the text
