# Supplementary material for: Phasevarions Mediate Random Switching of Gene Expression in Pathogenic Neisseria
Source: PubMed Central journal article supplement (PMC2667262; doi:10.1371/journal.ppat.1000400), 2009-04-24
Supplement: ppat.1000400.s011.pdf [file ppat.1000400.s011.pdf]

**Table S3. Differentially expressed genes in *N. meningitidis* wild-type MC58 *modA11* ON versus the MC58 *modA11::kan* mutant**

| Gene ID                                                           | Gene                                                               | Ratio | Qrt-pcr    | B-stat |
|-------------------------------------------------------------------|--------------------------------------------------------------------|-------|------------|--------|
| <b>Reduced expression in <i>N. meningitidis modA11</i> mutant</b> |                                                                    |       |            |        |
| NMB0010                                                           | phosphoglycerate kinase                                            | 0.41  |            | 3.12   |
| NMB0011                                                           | UDP-N-acetylglucosamine 1-carboxyvinyltransferase                  | 0.66  |            | 1.28   |
| NMB0059                                                           | dnaJ protein                                                       | 0.55  |            | 3.82   |
| NMB0085                                                           | sodium/glutamate symporter                                         | 0.57  |            | 3.19   |
| NMB0126                                                           | transcription antitermination protein NusG                         | 0.52  |            | 2.61   |
| NMB0129                                                           | hypothetical protein                                               | 0.53  |            | 4.34   |
| NMB0133                                                           | DNA-directed RNA polymerase, beta subunit                          | 0.41  |            | 4.72   |
| NMB0143                                                           | 50S ribosomal protein L4                                           | 0.49  |            | 2.82   |
| NMB0144                                                           | 50S ribosomal protein L23                                          | 0.38  | 0.58± 0.16 | 4.27   |
| NMB0146                                                           | 30S ribosomal protein S19                                          | 0.51  |            | 2.45   |
| NMB0147                                                           | 50S ribosomal protein L22                                          | 0.46  |            | 3.82   |
| NMB0148                                                           | 30S ribosomal protein S3                                           | 0.40  | 0.40± 0.06 | 5.44   |
| NMB0152                                                           | 50S ribosomal protein L14                                          | 0.49  |            | 4.12   |
| NMB0155                                                           | 30S ribosomal protein S14                                          | 0.43  | 0.57± 0.08 | 2.30   |
| NMB0156                                                           | 30S ribosomal protein S8                                           | 0.51  |            | 1.47   |
| NMB0159                                                           | 30s ribosomal protein S5                                           | 0.54  |            | 2.66   |
| NMB0166                                                           | 30S ribosomal protein S11                                          | 0.49  |            | 2.70   |
| NMB0186                                                           | undecaprenyl pyrophosphate synthetase                              | 0.67  |            | 1.56   |
| NMB0249                                                           | NADH dehydrogenase I, G subunit                                    | 0.57  |            | 2.50   |
| NMB0250                                                           | NADH dehydrogenase I, H subunit                                    | 0.57  |            | 2.79   |
| NMB0251                                                           | NADH dehydrogenase I, I subunit*                                   | 0.50  |            | 4.27   |
| NMB0252                                                           | hypothetical protein                                               | 0.46  |            | 4.51   |
| NMB0253                                                           | NADH dehydrogenase I, J subunit                                    | 0.61  |            | 2.95   |
| NMB0254                                                           | NADH dehydrogenase I, K subunit                                    | 0.66  |            | 1.77   |
| NMB0257                                                           | NADH dehydrogenase I, L subunit                                    | 0.56  |            | 3.43   |
| NMB0259                                                           | NADH dehydrogenase I, N subunit                                    | 0.55  |            | 3.26   |
| NMB0260                                                           | hypothetical protein                                               | 0.59  |            | 1.64   |
| NMB0266                                                           | conserved hypothetical protein                                     | 0.60  |            | 1.90   |
| NMB0276                                                           | conserved hypothetical protein                                     | 0.62  |            | 2.67   |
| NMB0277                                                           | virulence factor MviN                                              | 0.63  |            | 2.64   |
| NMB0322                                                           | 50S ribosomal protein L33                                          | 0.64  |            | 1.95   |
| NMB0326                                                           | octaprenyl-diphosphate synthase                                    | 0.63  |            | 2.52   |
| NMB0327                                                           | conserved hypothetical protein, authentic frameshift               | 0.60  |            | 1.96   |
| NMB0340                                                           | lactoylglutathione lyase*                                          | 0.49  |            | 4.68   |
| NMB0346                                                           | hypothetical protein                                               | 0.53  |            | 2.90   |
| NMB0347                                                           | conserved hypothetical protein                                     | 0.60  |            | 1.94   |
| NMB0378                                                           | phosphate permease, putative                                       | 0.43  |            | 4.96   |
| NMB0408                                                           | bacitracin resistance protein                                      | 0.63  |            | 0.74   |
| NMB0418                                                           | phospho-N-acetylmuramoyl-pentapeptide-transferase                  | 0.62  |            | 1.65   |
| NMB0419                                                           | conserved hypothetical protein                                     | 0.65  |            | 0.67   |
| NMB0420                                                           | UDP-N-acetylmuramoylalanine-D-glutamate ligase                     | 0.64  |            | 1.33   |
| NMB0422                                                           | UDP-N-acetylglucosamine-N-acetylmuramyl transferase                | 0.61  |            | 2.81   |
| NMB0423                                                           | UDP-N-acetylmuramate-alanine ligase                                | 0.60  |            | 1.58   |
| NMB0424                                                           | D-alanine--D-alanine ligase                                        | 0.51  |            | 3.52   |
| NMB0426                                                           | cell division protein FtsA                                         | 0.66  |            | 1.85   |
| NMB0465                                                           | conserved hypothetical protein                                     | 0.59  |            | 3.19   |
| NMB0466                                                           | aspartyl-tRNA synthetase                                           | 0.57  |            | 3.11   |
| NMB0472                                                           | 8-amino-7-oxononanoate synthase                                    | 0.57  |            | 3.85   |
| NMB0525                                                           | aluminum resistance protein, putative                              | 0.64  |            | 2.20   |
| NMB0529                                                           | conserved hypothetical protein                                     | 0.64  |            | 1.37   |
| NMB0531                                                           | conserved hypothetical protein                                     | 0.54  |            | 3.50   |
| NMB0535                                                           | glucose/galactose transporter                                      | 0.53  |            | 2.75   |
| NMB0536                                                           | Na <sup>+</sup> /H <sup>+</sup> antiporter                         | 0.51  |            | 3.95   |
| NMB0564                                                           | Na(+)-translocating NADH-quinone reductase, subunit F              | 0.50  |            | 3.87   |
| NMB0565                                                           | Na(+)-translocating NADH-quinone reductase, subunit E              | 0.64  |            | 1.57   |
| NMB0566                                                           | Na(+)-translocating NADH-quinone reductase, subunit D              | 0.56  |            | 2.50   |
| NMB0567                                                           | Na(+)-translocating NADH-quinone reductase, subunit C              | 0.59  |            | 2.32   |
| NMB0568                                                           | Na(+)-translocating NADH-quinone reductase, subunit B*             | 0.49  |            | 4.81   |
| NMB0569                                                           | Na(+)-translocating NADH-quinone reductase, subunit A              | 0.61  |            | 3.12   |
| NMB0589                                                           | 50s ribosomal protein L19                                          | 0.59  |            | 3.48   |
| NMB0596                                                           | hypothetical protein                                               | 0.53  |            | 4.61   |
| NMB0599                                                           | conserved hypothetical protein                                     | 0.65  |            | 1.88   |
| NMB0623                                                           | spermidine/putrescine ABC transporter, periplasmic binding protein | 0.51  |            | 4.06   |
| NMB0626                                                           | peptide chain release factor 3                                     | 0.56  |            | 2.46   |
| NMB0663                                                           | outer membrane protein NspA                                        | 0.63  |            | 2.00   |

|         |                                                                              |      |      |
|---------|------------------------------------------------------------------------------|------|------|
| NMB0665 | oxygen-independent coprophorphyrinogen III oxidase family protein            | 0.64 | 2.34 |
| NMB0700 | IgA-specific serine endopeptidase                                            | 0.57 | 3.97 |
| NMB0702 | competence protein ComA                                                      | 0.67 | 1.63 |
| NMB0710 | hypothetical protein                                                         | 0.64 | 2.15 |
| NMB0718 | ferrochelataase                                                              | 0.58 | 3.33 |
| NMB0720 | threonyl-tRNA synthetase                                                     | 0.66 | 2.08 |
| NMB0729 | integration host factor, alpha subunit                                       | 0.63 | 0.11 |
| NMB0735 | 4-hydroxybenzoate octaprenyltransferase                                      | 0.66 | 0.86 |
| NMB0758 | polyribonucleotide nucleotidyltransferase                                    | 0.45 | 4.56 |
| NMB0777 | uroporphyrinogen-III synthase HemD, putative                                 | 0.65 | 0.41 |
| NMB0780 | hypothetical protein                                                         | 0.63 | 1.53 |
| NMB0788 | amino acid ABC transporter, permease protein                                 | 0.60 | 3.14 |
| NMB0789 | amino acid ABC transporter, ATP-binding protein                              | 0.61 | 2.97 |
| NMB0800 | conserved hypothetical protein                                               | 0.62 | 2.36 |
| NMB0827 | type II restriction enzyme-related protein, authentic frameshift             | 0.61 | 2.39 |
| NMB0828 | ADP-L-glycero-D-mannoheptose-6-epimerase                                     | 0.54 | 3.04 |
| NMB0829 | type I restriction enzyme EcoR124II M protein                                | 0.62 | 1.40 |
| NMB0850 | hypothetical protein                                                         | 0.64 | 0.98 |
| NMB0875 | ribose-phosphate pyrophosphokinase                                           | 0.54 | 3.21 |
| NMB0878 | threonine dehydratase                                                        | 0.55 | 3.31 |
| NMB0898 | hypothetical protein                                                         | 0.66 | 0.36 |
| NMB0937 | elongation factor P (EF-P)                                                   | 0.45 | 4.08 |
| NMB1036 | 3-isopropylmalate dehydratase, large subunit                                 | 0.62 | 1.94 |
| NMB1037 | glutamate-cysteine ligase                                                    | 0.53 | 3.94 |
| NMB1038 | DNA repair protein RadC                                                      | 0.64 | 0.69 |
| NMB1070 | 2-isopropylmalate synthase                                                   | 0.57 | 0.11 |
| NMB1072 | prolipoprotein diacylglycerol transferase                                    | 0.65 | 1.84 |
| NMB1128 | conserved hypothetical protein                                               | 0.54 | 3.28 |
| NMB1131 | chaperone protein HscA                                                       | 0.65 | 0.95 |
| NMB1132 | hypothetical protein                                                         | 0.61 | 0.94 |
| NMB1133 | conserved hypothetical protein / ankyrin-related protein                     | 0.60 | 3.07 |
| NMB1134 | ferredoxin, 2Fe-2S type                                                      | 0.56 | 1.92 |
| NMB1146 | biotin synthetase                                                            | 0.65 | 2.24 |
| NMB1149 | hypothetical protein                                                         | 0.67 | 1.69 |
| NMB1238 | peptidyl-prolyl cis-trans isomerase-related protein                          | 0.62 | 2.66 |
| NMB1252 | phosphoribosylformylglycinamide cyclo-ligase                                 | 0.56 | 2.94 |
| NMB1269 | hypothetical protein                                                         | 0.63 | 2.69 |
| NMB1273 | alginate O-acetylation protein AlgI, putative                                | 0.61 | 0.68 |
| NMB1288 | ribonucleoside-diphosphate reductase, beta subunit                           | 0.63 | 1.72 |
| NMB1289 | type II restriction enzyme, putative                                         | 0.61 | 1.38 |
| NMB1298 | ribosomal small subunit pseudouridine synthase A                             | 0.61 | 2.98 |
| NMB1301 | 30S ribosomal protein S1                                                     | 0.58 | 2.86 |
| NMB1302 | integration host factor, beta subunit*                                       | 0.43 | 6.20 |
| NMB1312 | ATP-dependent Clp protease, proteolytic subunit                              | 0.64 | 1.72 |
| NMB1313 | trigger factor                                                               | 0.40 | 5.59 |
| NMB1314 | cell division protein FtsK                                                   | 0.65 | 1.28 |
| NMB1320 | 50S ribosomal protein L9                                                     | 0.62 | 0.10 |
| NMB1321 | 30S ribosomal protein S18                                                    | 0.54 | 2.39 |
| NMB1323 | 30S ribosomal protein S6                                                     | 0.58 | 3.45 |
| NMB1338 | isomerase, putative                                                          | 0.61 | 0.77 |
| NMB1362 | oxalate/formate antiporter, putative                                         | 0.62 | 1.64 |
| NMB1368 | ATP-dependent RNA helicase, putative                                         | 0.63 | 0.14 |
| NMB1375 | modification methylase, putative, authentic frameshift                       | 0.63 | 0.95 |
| NMB1394 | 4-hydroxy-2-oxoglutarate aldolase/2-dehydro-3-deoxyphosphogluconate aldolase | 0.45 | 5.30 |
| NMB1425 | lysyl-tRNA synthetase, heat inducible                                        | 0.58 | 2.87 |
| NMB1446 | 3-dehydroquininate dehydratase                                               | 0.65 | 0.79 |
| NMB1457 | transketolase                                                                | 0.66 | 2.02 |
| NMB1467 | exopolyphosphatase                                                           | 0.59 | 3.69 |
| NMB1485 | conserved hypothetical protein                                               | 0.57 | 2.27 |
| NMB1487 | fimbrial assembly protein                                                    | 0.64 | 1.95 |
| NMB1498 | aspartokinase, alpha and beta subunits                                       | 0.63 | 2.66 |
| NMB1506 | arginyl-tRNA synthetase                                                      | 0.59 | 2.45 |
| NMB1555 | long-chain-fatty-acid--CoA ligase                                            | 0.65 | 1.68 |
| NMB1571 | conserved hypothetical protein                                               | 0.61 | 2.74 |
| NMB1573 | ornithine carbamoyltransferase, catabolic                                    | 0.61 | 0.96 |
| NMB1577 | acetolactate synthase III, large subunit                                     | 0.58 | 1.60 |
| NMB1621 | glutathione peroxidase                                                       | 0.51 | 3.25 |
| NMB1642 | N utilization substance protein A                                            | 0.65 | 1.91 |
| NMB1643 | translation initiation factor IF-2                                           | 0.60 | 3.37 |
| NMB1658 | DNA/pantothenate metabolism flavoprotein                                     | 0.62 | 0.90 |
| NMB1664 | protease, putative                                                           | 0.63 | 2.06 |
| NMB1669 | iron-starvation protein PigA                                                 | 0.51 | 4.88 |

|         |                                                             |      |      |
|---------|-------------------------------------------------------------|------|------|
| NMB1670 | PqiA family protein                                         | 0.59 | 2.68 |
| NMB1671 | pqiB protein                                                | 0.61 | 1.44 |
| NMB1703 | 3-oxoacyl-(acyl-carrier-protein) synthase II                | 0.60 | 2.30 |
| NMB1714 | multidrug efflux pump channel protein MtrE                  | 0.59 | 0.67 |
| NMB1715 | multiple transferable resistance system protein MtrD        | 0.61 | 2.04 |
| NMB1729 | biopolymer transport protein ExbB                           | 0.49 | 5.00 |
| NMB1804 | cytochrome c-type biogenesis protein, putative              | 0.65 | 1.33 |
| NMB1823 | valine--pyruvate aminotransferase                           | 0.59 | 3.20 |
| NMB1851 | hypothetical protein                                        | 0.66 | 1.78 |
| NMB1861 | acetyl-CoA carboxylase, biotin carboxylase                  | 0.57 | 3.71 |
| NMB1905 | ribonuclease P protein component                            | 0.66 | 0.95 |
| NMB1929 | lacto-N-neotetraose biosynthesis glycosyl transferase LgtA  | 0.56 | 3.97 |
| NMB1932 | glycyl-tRNA synthetase, alpha chain                         | 0.59 | 2.85 |
| NMB1937 | ATP synthase F1, delta subunit                              | 0.47 | 2.35 |
| NMB1963 | conserved hypothetical protein                              | 0.62 | 2.30 |
| NMB1976 | diaminopimelate decarboxylase                               | 0.64 | 1.78 |
| NMB1996 | phosphoribosylformylglycinamide synthase                    | 0.65 | 1.26 |
| NMB2051 | ubiquinol-cytochrome c reductase, cytochrome c1             | 0.58 | 3.03 |
| NMB2052 | ubiquinol-cytochrome c reductase, cytochrome b <sup>*</sup> | 0.50 | 4.48 |
| NMB2057 | 50S ribosomal protein L13                                   | 0.47 | 3.91 |
| NMB2075 | BirA protein/Bvg accessory factor                           | 0.61 | 2.73 |
| NMB2079 | aspartate-semialdehyde dehydrogenase                        | 0.56 | 4.21 |
| NMB2133 | sodium/dicarboxylate symporter family protein               | 0.44 | 3.55 |
| NMB2151 | phosphoribosylamine--glycine ligase                         | 0.52 | 3.28 |
| NMB2153 | conserved hypothetical protein                              | 0.53 | 3.29 |

**Increased expression in *N. meningitidis modA11* mutant**

|         |                                                           |      |                 |
|---------|-----------------------------------------------------------|------|-----------------|
| NMB0006 | thioredoxin-related protein                               | 2.58 | 3.48            |
| NMB0014 | 3-deoxy-D-manno-octulosonic-acid transferase              | 2.97 | 2.46± 0.50 5.89 |
| NMB0021 | pilS cassette                                             | 1.97 | 3.16            |
| NMB0029 | glycerate dehydrogenase                                   | 1.74 | 1.56            |
| NMB0031 | glucosamine-fructose-6-phosphate aminotransferase         | 1.85 | 3.39            |
| NMB0063 | dTDP-D-glucose 4,6-dehydratase                            | 2.16 | 3.48            |
| NMB0064 | UDP-glucose 4-epimerase                                   | 1.57 | 1.99            |
| NMB0071 | capsule polysaccharide export outer membrane protein CtrA | 1.51 | 1.58            |
| NMB0105 | PhnO-related protein                                      | 1.60 | 1.33            |
| NMB0110 | polypeptide deformylase                                   | 3.12 | 7.09            |
| NMB0122 | conserved hypothetical protein                            | 1.97 | 3.52            |
| NMB0177 | sodium/alanine symporter, putative                        | 2.46 | 5.66            |
| NMB0190 | glucose inhibited division protein B                      | 1.84 | 3.25            |
| NMB0205 | ferric uptake regulation protein <sup>*</sup>             | 1.91 | 2.47            |
| NMB0228 | conserved hypothetical protein                            | 1.60 | 1.58            |
| NMB0290 | transcriptional regulator, putative                       | 2.50 | 6.36            |
| NMB0308 | dihydrofolate reductase                                   | 1.75 | 1.62            |
| NMB0334 | glucose-6-phosphate isomerase                             | 2.38 | 3.22            |
| NMB0352 | sugar isomerase, KpsF/GutQ family                         | 1.54 | 0.14            |
| NMB0358 | shikimate 5-dehydrogenase                                 | 1.83 | 2.50            |
| NMB0394 | quinolinate synthetase A                                  | 1.89 | 1.63            |
| NMB0398 | transcriptional regulator, ArsR family                    | 1.85 | 1.49            |
| NMB0399 | exodeoxyribonuclease III                                  | 1.82 | 2.50            |
| NMB0427 | cell division protein FtsZ                                | 1.64 | 2.24            |
| NMB0430 | carboxyphosphoenolpyruvate phosphonmutase, putative       | 1.69 | 1.26            |
| NMB0431 | methylcitrate synthase/citrate synthase 2                 | 2.30 | 4.07            |
| NMB0461 | transferrin-binding protein 1                             | 1.59 | 1.47            |
| NMB0516 | hypothetical protein                                      | 1.59 | 0.59            |
| NMB0548 | AcrA/AcrE family protein                                  | 1.50 | 1.68            |
| NMB0549 | ABC transporter, ATP-binding protein                      | 1.69 | 3.10            |
| NMB0556 | repressor protein, putative <sup>*</sup>                  | 2.71 | 3.45            |
| NMB0586 | adhesin, putative                                         | 1.94 | 1.49            |
| NMB0618 | phosphoenolpyruvate synthase                              | 1.62 | 1.65            |
| NMB0671 | malate oxidoreductase (NAD)                               | 1.68 | 3.42            |
| NMB0681 | conserved hypothetical protein                            | 1.53 | 1.73            |
| NMB0711 | conserved hypothetical protein                            | 1.81 | 2.69            |
| NMB0740 | DNA repair protein RecN <sup>*</sup>                      | 3.51 | 4.16            |
| NMB0756 | dTDP-L-rhamnose synthase, putative                        | 2.31 | 4.23            |
| NMB0765 | signal peptidase I                                        | 1.60 | 1.87            |
| NMB0808 | hypothetical protein                                      | 1.96 | 1.59            |
| NMB0821 | hypothetical protein                                      | 1.74 | 1.43            |
| NMB0845 | PhoH-related protein                                      | 1.89 | 2.07            |
| NMB0865 | hypothetical protein                                      | 1.64 | 2.07            |
| NMB0872 | conserved hypothetical protein                            | 1.58 | 0.75            |
| NMB0882 | hypothetical protein                                      | 1.66 | 2.77            |

|         |                                                            |      |            |      |
|---------|------------------------------------------------------------|------|------------|------|
| NMB0896 | integrase, authentic frameshift                            | 1.94 |            | 2.25 |
| NMB0916 | hypothetical protein                                       | 1.77 |            | 3.92 |
| NMB0917 | death-on-curing protein                                    | 1.50 |            | 0.20 |
| NMB0921 | hypothetical protein                                       | 2.57 |            | 3.11 |
| NMB0929 | dihydrodipicolinate synthase                               | 1.81 |            | 3.32 |
| NMB0942 | 50S ribosomal protein L31, putative                        | 1.84 |            | 1.66 |
| NMB0953 | hypothetical protein                                       | 2.31 |            | 4.63 |
| NMB0954 | citrate synthase                                           | 2.41 |            | 1.10 |
| NMB0997 | D-lactate dehydrogenase                                    | 1.81 |            | 2.01 |
| NMB1024 | conserved hypothetical protein                             | 1.56 |            | 2.19 |
| NMB1026 | conserved hypothetical protein                             | 1.57 |            | 0.82 |
| NMB1048 | hypothetical protein                                       | 1.85 |            | 2.45 |
| NMB1055 | serine hydroxymethyltransferase                            | 1.53 |            | 0.47 |
| NMB1076 | DnaA-related protein                                       | 1.60 |            | 0.52 |
| NMB1088 | conserved hypothetical protein                             | 1.79 |            | 3.39 |
| NMB1110 | tail protein, 43 kDa                                       | 1.57 |            | 0.88 |
| NMB1117 | hypothetical protein                                       | 2.45 |            | 1.55 |
| NMB1127 | oxidoreductase, short chain dehydrogenase/reductase family | 1.62 |            | 2.12 |
| NMB1158 | nickel-dependent hydrogenase, b-type cytochrome subunit    | 2.41 |            | 4.12 |
| NMB1159 | conserved hypothetical protein                             | 1.54 |            | 1.55 |
| NMB1209 | hypothetical protein                                       | 1.57 |            | 1.28 |
| NMB1218 | conserved hypothetical protein                             | 1.64 |            | 2.33 |
| NMB1220 | stomatin/Mec-2 family protein                              | 1.77 |            | 3.51 |
| NMB1221 | hypothetical protein                                       | 1.67 |            | 1.63 |
| NMB1226 | ABC transporter, ATP-binding protein                       | 1.56 |            | 0.73 |
| NMB1295 | formamidopyrimidine-DNA glycosylase                        | 1.67 |            | 2.61 |
| NMB1306 | conserved hypothetical protein                             | 1.63 |            | 2.91 |
| NMB1360 | pyridoxamine 5-phosphate oxidase                           | 1.85 |            | 2.41 |
| NMB1370 | hypothetical protein                                       | 1.50 |            | 0.85 |
| NMB1387 | hypothetical protein                                       | 1.67 |            | 2.69 |
| NMB1395 | alcohol dehydrogenase, zinc-containing*                    | 2.23 |            | 4.89 |
| NMB1405 | FrpA/C-related protein                                     | 1.58 |            | 0.76 |
| NMB1417 | conserved hypothetical protein                             | 1.85 |            | 3.54 |
| NMB1428 | aminopeptidase, putative                                   | 1.89 |            | 3.24 |
| NMB1458 | fumarate hydratase, class II, aerobic                      | 2.87 |            | 4.90 |
| NMB1466 | conserved hypothetical protein                             | 1.72 |            | 2.67 |
| NMB1475 | conserved hypothetical protein                             | 1.55 |            | 1.91 |
| NMB1482 | acyl CoA thioester hydrolase family protein                | 1.83 |            | 2.02 |
| NMB1491 | hypothetical protein                                       | 1.62 |            | 0.95 |
| NMB1500 | conserved hypothetical protein                             | 3.25 |            | 7.04 |
| NMB1529 | hypothetical protein                                       | 1.66 |            | 3.21 |
| NMB1530 | succinyl-diaminopimelate desuccinylase                     | 1.61 |            | 2.06 |
| NMB1531 | conserved hypothetical protein                             | 1.54 |            | 0.46 |
| NMB1540 | lactoferrin-binding protein A*                             | 2.33 | 3.39± 0.47 | 5.51 |
| NMB1541 | lactoferrin-binding protein B*                             | 2.22 | 2.26± 0.63 | 4.10 |
| NMB1572 | aconitate hydratase 2                                      | 1.69 |            | 1.82 |
| NMB1590 | conserved hypothetical protein                             | 3.89 |            | 5.22 |
| NMB1609 | trans-sulfuration enzyme family protein                    | 1.64 |            | 1.03 |
| NMB1620 | conserved hypothetical protein                             | 1.54 |            | 2.24 |
| NMB1622 | nitric oxide reductase                                     | 1.87 |            | 4.08 |
| NMB1665 | conserved hypothetical protein                             | 1.54 |            | 1.22 |
| NMB1684 | seryl-tRNA synthetase                                      | 1.93 |            | 4.40 |
| NMB1692 | chorismate mutase-related protein                          | 1.92 |            | 4.78 |
| NMB1727 | conserved hypothetical protein                             | 1.75 |            | 2.41 |
| NMB1735 | GTP pyrophosphokinase                                      | 1.50 |            | 0.91 |
| NMB1839 | formate--tetrahydrofolate ligase                           | 2.22 |            | 5.05 |
| NMB1840 | conserved hypothetical protein                             | 2.58 |            | 6.21 |
| NMB1868 | integrase/recombinase XerC                                 | 1.71 |            | 3.06 |
| NMB1871 | conserved hypothetical protein                             | 1.63 |            | 2.38 |
| NMB1872 | ribosomal-protein-alanine acetyltransferase, putative      | 1.52 |            | 1.96 |
| NMB1879 | hypothetical protein                                       | 1.74 |            | 2.79 |
| NMB1890 | conserved hypothetical protein                             | 2.19 |            | 3.89 |
| NMB1891 | helix-turn-helix family protein                            | 2.43 |            | 0.82 |
| NMB1892 | hypothetical protein                                       | 1.65 |            | 1.96 |
| NMB1898 | lipoprotein*                                               | 2.48 | 2.24± 0.58 | 4.32 |
| NMB1909 | Maf/YceF/YhdE family protein                               | 1.87 |            | 2.73 |
| NMB1957 | hypothetical protein                                       | 1.64 |            | 1.99 |
| NMB1969 | serotype-1-specific antigen, putative                      | 1.58 |            | 2.64 |
| NMB1989 | iron(III) ABC transporter, periplasmic binding protein     | 1.51 |            | 1.98 |
| NMB1995 | nitrogen regulatory protein P-II                           | 1.66 |            | 1.38 |
| NMB2009 | ATP-dependent RNA helicase HrpA, degenerate                | 1.54 |            | 1.49 |
| NMB2019 | lipopolysaccharide core biosynthesis protein KdtB          | 1.75 |            | 0.03 |

|         |                                          |      |      |
|---------|------------------------------------------|------|------|
| NMB2037 | hypothetical protein                     | 1.71 | 2.25 |
| NMB2043 | IS1106 transposase, putative, degenerate | 2.46 | 3.85 |
| NMB2050 | conserved hypothetical protein           | 1.78 | 3.44 |
| NMB2078 | conserved hypothetical protein           | 1.65 | 2.34 |
| NMB2090 | phosphoheptose isomerase                 | 2.30 | 5.15 |
| NMB2091 | hemolysin, putative                      | 1.90 | 4.67 |
| NMB2142 | conserved hypothetical protein           | 1.71 | 3.33 |

---

The genes listed are either down- or up- regulated in the *N. meningitidis* MC58 *modA11::kan* mutant strain. The identity of the gene is indicated with the gene ID in the annotation of the *N. meningitidis* strain MC58 genome (TIGR). The average ratio presented is the mean of MC58 *modA11::kan* mutant: wild-type MC58 *modA11* ON from 6 replicate spots on 3 independent microarrays, incorporating a dye swap. Only those genes with an expression value above 1.5-fold were included in this study except for NMB0205 and NMB2091, which are shown in italics. \* Genes have been shown to be Fur regulated [55, 56].
