# Supplementary material for: Phasevarions Mediate Random Switching of Gene Expression in Pathogenic Neisseria
Source: PubMed Central journal article supplement (PMC2667262; doi:10.1371/journal.ppat.1000400), 2009-04-24
Supplement: ppat.1000400.s012.pdf [file ppat.1000400.s012.pdf]

**Table S4. Differentially expressed genes in *N. meningitidis* wild-type B6116/77 *modA12* ON versus the mutant strain B6616/77 *modA12::kan***

| Gene ID                                                             | Gene                                                            | Ratio       | Qrt-pcr           | B-stat      |
|---------------------------------------------------------------------|-----------------------------------------------------------------|-------------|-------------------|-------------|
| <b>Reduced expression in <i>N. meningitidis modA12</i> mutant</b>   |                                                                 |             |                   |             |
| NMA1203                                                             | hypothetical protein                                            | 0.58        |                   | 6.39        |
| <i>NMA1581</i>                                                      | <i>membrane lipoprotein</i>                                     | <i>0.72</i> | <i>0.65± 0.14</i> | <i>4.35</i> |
| NMA1590                                                             | type III restriction/modification system modification methylase | 0.13        | 0.07± 0.002       | 2.06        |
| NMA1591                                                             | type III restriction/modification system enzyme                 | 0.67        |                   | 2.45        |
| NMA1670                                                             | fumarate hydratase                                              | 0.64        |                   | 5.28        |
| NMB0292                                                             | conserved hypothetical protein                                  | 0.61        |                   | 2.41        |
| NMB0995                                                             | macrophage infectivity potentiator-related protein              | 0.65        |                   | 2.99        |
| NMB1017                                                             | sulfate ABC transporter, periplasmic sulfate-binding protein    | 0.59        |                   | 4.40        |
| NMB1070                                                             | 2-isopropylmalate synthase                                      | 0.64        |                   | 6.51        |
| NMB1191                                                             | sulfate adenylyltransferase, subunit 1                          | 0.67        |                   | 1.92        |
| NMB1426                                                             | hypothetical protein                                            | 0.44        |                   | 7.78        |
| NMB1458                                                             | fumarate hydratase, class II, aerobic                           | 0.60        |                   | 3.59        |
| <b>Increased expression in <i>N. meningitidis modA12</i> mutant</b> |                                                                 |             |                   |             |
| NMA1623                                                             | hypothetical protein                                            | 1.72        |                   | 6.09        |
| NMA2088                                                             | nicotinate-nucleotide pyrophosphorylase                         | 2.05        |                   | 7.19        |
| NMB0245                                                             | NADH dehydrogenase I, E subunit                                 | 1.57        |                   | 4.45        |
| NMB0246                                                             | NADH dehydrogenase I, F subunit                                 | 1.55        |                   | 7.28        |
| NMB0396                                                             | nicotinate-nucleotide pyrophosphorylase                         | 1.62        |                   | 3.36        |
| NMB0950                                                             | succinate dehydrogenase, flavoprotein subunit                   | 1.67        |                   | 5.21        |
| NMB0951                                                             | succinate dehydrogenase, iron-sulfur protein                    | 1.83        | 2.61± 0.46        | 2.90        |
| NMB0952                                                             | conserved hypothetical protein                                  | 1.68        |                   | 2.46        |
| NMB0953                                                             | hypothetical protein                                            | 1.76        |                   | 6.87        |
| NMB0954                                                             | citrate synthase                                                | 1.53        |                   | 3.96        |
| <i>NMB1206</i>                                                      | <i>bacterioferritin B</i>                                       | <i>1.42</i> | <i>2.14± 0.35</i> | <i>2.48</i> |
| NMB1403                                                             | FrpA-C-related protein                                          | 1.65        |                   | 5.40        |
| NMB1405                                                             | FrpA-C-related protein                                          | 1.73        | 2.21± 0.49        | 4.25        |
| NMB1424                                                             | hypothetical protein                                            | 1.54        |                   | 3.57        |

The genes listed are either down- or up- regulated in the *N. meningitidis* B6116/77 *modA12::kan* mutant strain. The identity of the gene is indicated with the gene ID in the annotation of the *N. meningitidis* strain MC58 and Z2491 genome (TIGR). The average ratio presented is the mean of B6116/77 *modA12::kan* mutant:wild-type B6116/77 *modA12* ON from six replicate spots on seven independent microarrays, incorporating a dye swap. Only those genes with an expression value above 1.5-fold were included in this study except for NMA1581 and NMB1206, which are shown in italics.
