# Supplementary material for: Phasevarions Mediate Random Switching of Gene Expression in Pathogenic Neisseria
Source: PubMed Central journal article supplement (PMC2667262; doi:10.1371/journal.ppat.1000400), 2009-04-24
Supplement: ppat.1000400.s013.pdf [file ppat.1000400.s013.pdf]

**Table S5. Differentially expressed genes in *N. gonorrhoeae* wild-type FA1090 *modA13* ON versus the mutant strain FA1090 *modA13::kan*.**

| Gene ID                                                            | Gene                                                                     | Ratio | Qrt-per | B-stat |
|--------------------------------------------------------------------|--------------------------------------------------------------------------|-------|---------|--------|
| <b>Reduced expression in <i>N. gonorrhoeae modA13</i> mutant</b>   |                                                                          |       |         |        |
| NGO0055                                                            | PilC2                                                                    | 0.62  |         | 0.25   |
| NGO0554                                                            | hypothetical protein                                                     | 0.49  |         | 2.56   |
| NGO0574                                                            | carbonic anhydrase                                                       | 0.58  |         | 0.15   |
| NGO0641                                                            | type III modI Modification methylase                                     | 0.55  |         | 3.02   |
| NGO0714                                                            | 6-phosphogluconate dehydratase                                           | 0.67  |         | 1.28   |
| NGO0754                                                            | molybdopterin-guanine dinucleotide biosynthesis protein                  | 0.55  |         | 3.91   |
| NGO0794                                                            | bacterioferritin                                                         | 0.59  |         | 1.59   |
| NGO0867                                                            | Helix-turn-helix domain protein possible transcriptional regulator       | 0.57  |         | 1.26   |
| NGO1247                                                            | CDP-diacylglycerol-glycerol-3-phosphate 3-phosphatidyltransferase        | 0.63  |         | 1.22   |
| NGO1258                                                            | phosphoglycerate mutase                                                  | 0.64  |         | 1.28   |
| NGO1318                                                            | haem utilisation protein                                                 | 0.61  |         | 2.58   |
| NGO1365                                                            | membrane fusion protein mtrc precursor                                   | 0.62  |         | 1.33   |
| NGO1442                                                            | alcohol dehydrogenase, propanol-preferring (zn dependent)                | 0.52  |         | 3.21   |
| NGO1581                                                            | phosphate permease, putative                                             | 0.29  |         | 8.53   |
| NGO1587                                                            | adhesin MafB2                                                            | 0.61  |         | 2.57   |
| NGO1701                                                            | Tat (twin-arginine translocation) pathway signal sequence domain protein | 0.6   |         | 1.40   |
| NGO1931                                                            | glyceraldehyde-3-phosphate dehydrogenase, type I                         | 0.37  |         | 5.10   |
| NGO1947                                                            | putative periplasmic protein                                             | 0.67  |         | 1.12   |
| NGO2062                                                            | truncated silent pilin gene                                              | 0.42  |         | 6.27   |
| NGO2066                                                            | pilin silent gene cassette                                               | 0.41  |         | 5.11   |
| <b>Increased expression in <i>N. gonorrhoeae modA13</i> mutant</b> |                                                                          |       |         |        |
| NGO0057                                                            | thioredoxin                                                              | 1.71  |         | 3.34   |
| NGO0198                                                            | ammonium transporter                                                     | 3.18  |         | 6.45   |
| NGO0318                                                            | DNA repair protein RecN                                                  | 1.98  |         | 2.02   |
| NGO0340                                                            | cysteine synthase                                                        | 2.23  |         | 4.20   |
| NGO0372                                                            | amino acid ABC transporter, periplasmic amino acid-binding protein       | 2.27  |         | 3.28   |
| NGO0373                                                            | amino acid ABC transporter, permease protein                             | 3.01  |         | 5.47   |
| NGO0374                                                            | amino acid ABC transporter, ATP-binding protein                          | 2.81  |         | 7.14   |
| NGO0376                                                            | peptidyl-prolyl cis-trans isomerase                                      | 1.77  |         | 2.00   |
| NGO0584                                                            | ribosomal protein L9*                                                    | 1.64  |         | 2.07   |
| NGO0624                                                            | putative oxidoreductase                                                  | 1.58  |         | 1.81   |
| NGO0650                                                            | ATP-dependent RNA helicase, putative                                     | 3.14  |         | 6.62   |
| NGO0655                                                            | exodeoxyribonuclease VII, large subunit                                  | 3.16  |         | 5.91   |
| NGO0656                                                            | oxalate/formate antiporter                                               | 2.39  |         | 6.04   |
| NGO0659                                                            | CDP-6-deoxy-delta-3,4-glucoseen reductase, putative                      | 1.53  |         | 1.65   |
| NGO0768                                                            | hypothetical protein                                                     | 1.61  |         | 2.49   |
| NGO0775                                                            | ATP-dependent protease La                                                | 1.87  |         | 1.37   |
| NGO0878                                                            | sulfate ABC transporter, periplasmic sulfate-binding protein             | 1.62  |         | 0.54   |
| NGO0927                                                            | Neisseria specific protein conserved hypothetical protein                | 2.93  |         | 2.46   |
| NGO0928                                                            | 5-methyltetrahydropteroyltriglutamate                                    | 3.01  |         | 6.59   |
| NGO0929                                                            | 5,10-methylenetetrahydrofolate reductase                                 | 4.92  |         | 8.32   |
| NGO1046                                                            | ClpB protein endopeptidase                                               | 1.9   |         | 2.82   |
| NGO1220                                                            | Membrane protein of unknown function (DUF340) family                     | 1.84  |         | 1.41   |
| NGO1355                                                            | sodium- and chloride-dependent transporter                               | 2.17  |         | 2.21   |
| NGO1368                                                            | efflux pump component MtrF                                               | 2.2   |         | 5.51   |
| NGO1511                                                            | bicyclomycin resistance protein, putative                                | 1.75  |         | 0.05   |
| NGO1769                                                            | cytochrome c551 peroxidase                                               | 1.62  |         | 2.54   |
| NGO1822                                                            | preprotein translocase SECY subunit                                      | 1.76  |         | 1.38   |
| NGO1827                                                            | 50S ribosomal protein L5                                                 | 1.68  |         | 2.65   |
| NGO1836                                                            | ribosomal protein L23*                                                   | 1.52  |         | 0.74   |
| NGO1843                                                            | translation elongation factor G                                          | 1.79  |         | 1.86   |
| NGO1851                                                            | DNA-directed RNA polymerase, beta subunit*                               | 1.58  |         | 1.69   |
| NGO1901                                                            | chaperone protein dnaj                                                   | 1.71  |         | 3.20   |
| NGO2011                                                            | amino acid ABC transporter, permease protein glnM                        | 1.51  |         | 1.45   |
| NGO2012                                                            | amino acid ABC transporter, permease protein glnP                        | 1.75  |         | 3.19   |

The genes listed are either down- or up- regulated in the *N. gonorrhoeae* FA1090 *modA13::kan* mutant strain. The identity of the gene is indicated with the gene ID in the annotation of the *N. gonorrhoeae* genome (TIGR). The average ratio presented is the mean of FA1090 *modA13::kan* mutant:wild-type FA1090 *modA13* ON from six replicate spots

on three independent microarrays, incorporating a dye swap. Only those genes with an expression value above 1.5-fold were included in this study. \*Genes have been shown to be Fur regulated [56].
