# Supplementary material for: Phasevarions Mediate Random Switching of Gene Expression in Pathogenic Neisseria
Source: PubMed Central journal article supplement (PMC2667262; doi:10.1371/journal.ppat.1000400), 2009-04-24
Supplement: ppat.1000400.s014.pdf [file ppat.1000400.s014.pdf]

**Table S6. Differentially expressed genes in *N. gonorrhoeae* wild-type 96D551 *modA12* ON versus the mutant strain 96D551 *modA12::kan***

| Gene ID                                                            | Description                                              | Ratio | Qrt-pcr    | B-stat |
|--------------------------------------------------------------------|----------------------------------------------------------|-------|------------|--------|
| <b>Reduced expression in <i>N. gonorrhoeae modA12</i> mutant</b>   |                                                          |       |            |        |
| NGO0640                                                            | RmsR                                                     | 0.47  |            | 1.69   |
| NGO0797                                                            | putative transcriptional regulator                       | 0.48  |            | 1.07   |
| NGO1236                                                            | acetolactate synthase                                    | 0.66  |            | 0.16   |
| NGO2090                                                            | putative ABC transporter, permease protein, enterobactin | 0.44  |            | 1.72   |
| NGO2092                                                            | ferric enterobactin periplasmic binding protein          | 0.62  |            | 0.61   |
| NGO2093                                                            | FetA                                                     | 0.24  | 2.5± 0.056 | 2.51   |
| <b>Increased expression in <i>N. gonorrhoeae modA12</i> mutant</b> |                                                          |       |            |        |
| NGO0365                                                            | site-specific DNA-methyltransferase M.NgoVII             | 1.78  |            | 0.74   |
| NGO0364                                                            | restriction endonuclease R.NgoVII                        | 1.60  |            | 0.33   |
| NGO0861                                                            | hypothetical protein                                     | 2.43  |            | 2.01   |
| NGO0860                                                            | hypothetical protein                                     | 2.03  |            | 1.64   |
| NGO1046                                                            | putative ClpB protein                                    | 1.64  |            | 0.33   |
| NGO1516                                                            | quinolinate synthetase A                                 | 1.70  |            | 0.90   |

The genes listed are either down- or up- regulated in the *N. gonorrhoeae* 96D551 *modA12::kan* mutant strain. The identity of the gene is indicated with the gene ID in the annotation of the *N. gonorrhoeae* genome (TIGR). The average ratio presented is the mean of 96D551 *modA12::kan* mutant:wild-type 96D551 *modA12* ON from six replicate spots on three independent microarrays, incorporating a dye swap. Only those genes with an expression value above 1.5-fold were included in this study.
