# Supplementary material for: Phasevarions Mediate Random Switching of Gene Expression in Pathogenic Neisseria
Source: PubMed Central journal article supplement (PMC2667262; doi:10.1371/journal.ppat.1000400), 2009-04-24
Supplement: ppat.1000400.s016.pdf [file ppat.1000400.s016.pdf]

**Table S8a. Fragment analysis on FA1090 *modA13* ON/OFF Original Inoculum and 40, 50 and 60 ug/ml Triton X-100 concentrations**

| Sample                       | % ON in FA1090 ON Inoculum  | Average % ON or OFF | Std dev |
|------------------------------|-----------------------------|---------------------|---------|
| FA1090 Inoculum ON_1         | 89.65                       |                     |         |
| FA1090 Inoculum ON_2         | 88.86                       |                     |         |
| FA1090 Inoculum ON_2         | 87.87                       |                     |         |
|                              | % ON in FA1090 ON 40 ug/ml  | 88.79               | 0.892   |
| FA1090 <i>modA13</i> ON 40_1 | 62.54                       |                     |         |
| FA1090 <i>modA13</i> ON 40_2 | 40.89                       |                     |         |
| FA1090 <i>modA13</i> ON 40_3 | 55.58                       | 53.01               | 11.05   |
|                              | % ON in FA1090 ON 50 ug/ml  |                     |         |
| FA1090 <i>modA13</i> ON 50_1 | 10.84                       |                     |         |
| FA1090 <i>modA13</i> ON 50_2 | 35.09                       |                     |         |
| FA1090 <i>modA13</i> ON 50_3 | 13.19                       | 19.71               | 13.37   |
|                              | % ON in FA1090 ON 60 ug/ml  |                     |         |
| FA1090 <i>modA13</i> ON 60_1 | 24.37                       |                     |         |
| FA1090 <i>modA13</i> ON 60_2 | 10.05                       |                     |         |
| FA1090 <i>modA13</i> ON 60_3 | 25.12                       | 19.85               | 8.49    |
|                              | % OFF in FA1090 ON Inoculum |                     |         |
| FA1090Inoculum ON_1          | 10.35                       |                     |         |
| FA1090Inoculum ON_2          | 11.14                       |                     |         |
| FA1090Inoculum ON_3          | 12.13                       | 11.21               | 0.892   |
|                              | % OFF in FA1090 ON 40 ug/ml |                     |         |
| FA1090 <i>modA13</i> ON 40_1 | 37.46                       |                     |         |
| FA1090 <i>modA13</i> ON 40_2 | 59.11                       |                     |         |
| FA1090 <i>modA13</i> ON 40_3 | 44.42                       | 46.99               | 11.05   |
|                              | % OFF in FA1090 ON 50 ug/ml |                     |         |
| FA1090 <i>modA13</i> ON 50_1 | 89.16                       |                     |         |
| FA1090 <i>modA13</i> ON 50_2 | 64.91                       |                     |         |
| FA1090 <i>modA13</i> ON 50_3 | 86.81                       | 80.29               | 13.37   |
|                              | % OFF in FA1090 ON 60 ug/ml |                     |         |
| FA1090 <i>modA13</i> ON 60_1 | 75.63                       |                     |         |
| FA1090 <i>modA13</i> ON 60_2 | 89.95                       |                     |         |
| FA1090 <i>modA13</i> ON 60_3 | 74.88                       | 80.15               | 8.49    |

**Table S8b. FA1090 *ModA13* ON/OFF Ratio Student's *t*-test Results**

|                                                          | P-value |
|----------------------------------------------------------|---------|
| % ON in FA1090ON Inoculum vs % ON in FA1090 ON 40 ug/ml  | 0.02967 |
| % OFF in FA1090ON Inoculum vs % OFF in FA1090ON 40 ug/ml | 0.02967 |
|                                                          |         |
| % ON in FA1090ON Inoculum vs % ON in FA1090 ON 50 ug/ml  | 0.01198 |
| % OFF in FA1090ON Inoculum vs % OFF in FA1090ON 50 ug/ml | 0.01198 |
|                                                          |         |
| % ON in FA1090ON Inoculum vs % ON in FA1090 ON 60 ug/ml  | 0.00465 |
| % OFF in FA1090ON Inoculum vs % OFF in FA1090ON 60 ug/ml | 0.00465 |

Data above represents genescan analysis results where the size of the repeat tract was determined using fluorescent primers (see Materials and Methods) and contains values determined from 3 independent samples [17].
