# Supplementary material for: Phasevarions Mediate Random Switching of Gene Expression in Pathogenic Neisseria
Source: PubMed Central journal article supplement (PMC2667262; doi:10.1371/journal.ppat.1000400), 2009-04-24
Supplement: ppat.1000400.s017.pdf [file ppat.1000400.s017.pdf]

**Table S9a. Fragment analysis of O1G1370 *modA13* ON/OFF Original Inoculum and Survival+3hrs**

| Sample                | % ON in O1G1370 ON Inoculum    | Average % ON or OFF | Std dev |
|-----------------------|--------------------------------|---------------------|---------|
| O1G1370Inoculum ON_1  | 92.84                          |                     |         |
| O1G1370Inoculum ON_2  | 91.98                          |                     |         |
| O1G1370Inoculum ON_3  | 97.60                          | 94.14               | 3.03    |
|                       | % ON in O1G1370 ON_survial+3   |                     |         |
| O1G1370ON_1+3         | 55.91                          |                     |         |
| O1G1370ON_2+3         | 67.81                          |                     |         |
| O1G1370ON_3+3         | 26.76                          | 50.16               | 21.12   |
|                       | % OFF in O1G1370 ON Inoculum   |                     |         |
| O1G1370Inoculum ON_1  | 7.16                           |                     |         |
| O1G1370Inoculum ON_2  | 8.02                           |                     |         |
| O1G1370Inoculum ON_3  | 2.40                           | 5.86                | 3.03    |
|                       | % OFF in O1G1370 ON_survial+3  |                     |         |
| O1G1370ON_1+3         | 44.09                          |                     |         |
| O1G1370ON_2+3         | 32.20                          |                     |         |
| O1G1370ON_3+3         | 73.24                          | 49.84               | 21.12   |
|                       | % ON in O1G1370 OFF Inoculum   |                     |         |
| O1G1370Inoculum OFF_1 | 7.45                           |                     |         |
| O1G1370Inoculum OFF_2 | 7.21                           |                     |         |
| O1G1370Inoculum OFF_3 | 9.10                           | 7.92                | 1.03    |
|                       | % ON in O1G1370 OFF_survial+3  |                     |         |
| O1G1370OFF_1+3        | 1.46                           |                     |         |
| O1G1370OFF_2+3        | 11.91                          |                     |         |
| O1G1370OFF_3+3        | 9.52                           | 7.63                | 5.47    |
|                       | % OFF in O1G1370 OFF Inoculum  |                     |         |
| O1G1370Inoculum OFF_1 | 92.54                          |                     |         |
| O1G1370Inoculum OFF_2 | 92.79                          |                     |         |
| O1G1370Inoculum OFF_3 | 90.89                          | 92.07               | 1.03    |
|                       | % OFF in O1G1370 OFF_survial+3 |                     |         |
| O1G1370OFF_1+3        | 98.54                          |                     |         |
| O1G1370OFF_2+3        | 88.09                          |                     |         |
| O1G1370OFF_3+3        | 90.48                          | 93.37               | 5.47    |

**Table S9b. O1G1370 *ModA13* ON/OFF Ratio Student's *t*-test Results**

|                                                                | P-value  |
|----------------------------------------------------------------|----------|
| % ON in O1G1370ON Inoculum vs % ON in O1G1370 ON_survial+3     | 0.023357 |
| % OFF in O1G1370ON Inoculum vs % OFF in O1G1370 ON_survial+3   | 0.023357 |
|                                                                |          |
| % ON in O1G1370OFF Inoculum vs % ON in O1G1370 OFF_survial+3   | 0.932341 |
| % OFF in O1G1370OFF Inoculum vs % OFF in O1G1370 OFF_survial+3 | 0.932341 |

Data above represents genescan analysis results where the size of the repeat tract was determined using fluorescent primers (see Materials and Methods) and contains values determined from 3 independent samples [17].
