# Supplementary material for: Phasevarions Mediate Random Switching of Gene Expression in Pathogenic Neisseria
Source: PLoS Pathog. 2009 Apr 24;5(4):e1000400. doi: 10.1371/journal.ppat.1000400 (PMC2667262; doi:10.1371/journal.ppat.1000400)
Supplement: Table S1 — Mod alleles and repeat numbers for N. meningitidis isolate strains. aGenome strains. bNumber and expression state of repeats within the ModA11 or ModB1 gene; in-frame (ON) or out-of-frame (OFF). cRepeats can be either CCCAA, GCCAA, or TCCAA. dA strain was defined as having the modA11 allele if the DNA recognition region was ≥95% identical at the nucleotide level to modA11 gene of N. meningitidis strain MC58 (NMB1375; see Figure 1). A strain was defined as having the modB2 allele if the DNA recognition region was ≥95% identical at the nucleotide level to modB2 gene of N. meningitidis strain Z2491 (NMA1467; see Figure 1). eStrain defined as having modA4 or modA15 allele as defined in Fox et al. 2007 [17]. fStrain has a new allele henceforth defined as modA18 in this paper. Shares similarity to H. influenzae strain 2019. g modB1 strains that contain a premature stop codon. hFrame shift mutation in res at nucleotide 2093. ND, not determined. Refer to Figure 1 and to the text. (0.11 MB PDF) [file ppat.1000400.s009.pdf]

**Table S1. *Mod* alleles and repeat numbers for *N. meningitidis* isolate strains**

| Strain             | ST | <i>modA</i> allele <sup>d</sup> | Repeats AGCC <sup>b</sup> | ON/OFF <sup>b</sup> | <i>modB</i> allele <sup>d</sup> | Repeats CCCAA <sup>b,c</sup> | ON/OFF <sup>b</sup> |
|--------------------|----|---------------------------------|---------------------------|---------------------|---------------------------------|------------------------------|---------------------|
| MC58 <sup>a</sup>  | 32 | <i>modA11</i> <sup>h</sup>      | 20                        | OFF                 | <i>modB1</i> <sup>g</sup>       | 16                           | OFF                 |
| Z2491 <sup>a</sup> | 4  | <i>modA12</i>                   | 3                         | OFF                 | <i>modB2</i>                    | 8                            | OFF                 |
| 153                | 5  | <i>modA12</i>                   | 4                         | ON                  | ND                              |                              |                     |
| F6124              | 5  | <i>modA12</i>                   | 23                        | OFF                 | ND                              |                              |                     |
| 44/76              | 32 | <i>modA11</i>                   | 18                        | OFF                 | <i>modB1</i> <sup>g</sup>       | ND                           |                     |
| 14/1455            | 5  | <i>modA12</i>                   | 4                         | ON                  | <i>modB2</i>                    | 11                           | OFF                 |
| F4698              | 5  | <i>modA12</i>                   | 3                         | OFF                 | <i>modB2</i>                    | 13                           | OFF                 |
| 3906               | 17 | <i>ModA12</i>                   | 3                         | OFF                 | ND                              |                              |                     |
| NG PB24            | 32 | <i>modA11</i> <sup>h</sup>      | 29                        | OFF                 | <i>modB1</i>                    | 10                           | OFF                 |
| BZ 169             | 32 | <i>modA11</i> <sup>h</sup>      | 23                        | OFF                 | <i>modB1</i> <sup>g</sup>       | 10                           | OFF                 |
| 500                | 11 | <i>modA12</i>                   | 3                         | OFF                 | ND                              |                              |                     |
| BZ 10              | 8  | <i>modA11</i>                   | 8 AGTC                    | -                   | ND                              |                              |                     |
| BZ198              | 41 | <i>modA12</i>                   | 3                         | OFF                 | <i>modB2</i>                    | 5                            | OFF                 |
| NG P20             | 11 | <i>modA12</i>                   | 3                         | OFF                 | <i>modB2</i>                    | 7                            |                     |
| 297-0              | 49 | <i>modA15</i> <sup>e</sup>      | 27                        | OFF                 | <i>modB2</i>                    | 9 TCCAA                      | ON                  |
| 1000               | 20 | <i>modA12</i>                   | 3                         | OFF                 | ND                              |                              |                     |
| 8680               | 32 | <i>modA15</i> <sup>e</sup>      | 27                        | OFF                 | ND                              |                              |                     |
| AK50               | 41 | <i>modA12</i>                   | 10                        | ON                  | ND                              |                              |                     |
| 860060             | 24 | <i>modA12</i>                   | 3                         | OFF                 | ND                              |                              |                     |
| B6116/77           | 10 | <i>modA12</i>                   | 24                        | OFF                 | ND                              |                              |                     |
| M40/94             | 41 | <i>modA12</i>                   | 10                        | ON                  | <i>modB2</i>                    | 17 GCCAA                     | OFF                 |
| M-101/93           | 41 | <i>modA12</i>                   | 13                        | ON                  | <i>modB2</i>                    | 6 GCCAA/CCCAA                | ON                  |
| 312 901            | 8  | <i>modA12</i>                   | 10                        | ON                  | ND                              |                              |                     |
| 890326             | 28 | <i>modA12</i>                   | 7                         | ON                  | ND                              |                              |                     |
| 88/03415           | 46 | <i>modA12</i>                   | 16                        | ON                  | <i>modB2</i>                    | 9                            | ON                  |
| G2136              | 8  | <i>modA12</i>                   | 19                        | ON                  | ND                              |                              |                     |
| SB25               | 8  | <i>modA12</i>                   | 15                        | OFF                 | <i>modB2</i>                    | 8                            | OFF                 |
| 2059001            | 4  | <i>modA12</i>                   | 3                         | OFF                 | ND                              |                              |                     |
| A22                | 22 | <i>modA12</i>                   | 3                         | OFF                 | <i>modB2</i>                    | 13                           | OFF                 |
| E26                | 39 | <i>modA12</i>                   | 11                        | OFF                 | ND                              |                              |                     |
| N45/96             | 41 | <i>modA11</i>                   | 32                        | OFF                 | ND                              |                              |                     |
| E32                | 29 | <i>modA12</i>                   | 24                        | OFF                 | ND                              |                              |                     |
| 204/92             | 31 | <i>modA11</i>                   | 27                        | OFF                 | ND                              |                              |                     |
| 94/155             | 23 | <i>modA12</i>                   | 10                        | ON                  | ND                              |                              |                     |
| 50/94              | 33 | <i>modA12</i>                   | 16                        | ON                  | ND                              |                              |                     |
| 400                | 66 | <i>modA12</i>                   | 15                        | OFF                 | <i>modB2</i>                    | 6 GCCAA                      | ON                  |
| 931905             | 45 | <i>modA12</i>                   | 23                        | OFF                 | ND                              |                              |                     |
| 91/40              | 40 | <i>modA12</i>                   | 22                        | ON                  | ND                              |                              |                     |
| AK22               | 41 | <i>modA12</i>                   | 10                        | ON                  | <i>modB2</i>                    | 16 GCCAA                     | OFF                 |
| L93/4286           | 42 | <i>modA12</i>                   | 15                        | OFF                 | ND                              |                              |                     |
| 7891               | 8  | <i>modA12</i>                   | 3                         | OFF                 | <i>modB2</i>                    | 10                           | OFF                 |
| D8                 | 11 | <i>modA12</i>                   | 3                         | OFF                 | <i>modB2</i>                    | 8                            | OFF                 |
| C751               | 5  | <i>modA12</i>                   | 3                         | OFF                 | ND                              |                              |                     |

|          |    |                           |    |     |                          |          |     |
|----------|----|---------------------------|----|-----|--------------------------|----------|-----|
| 26       | 12 | <i>modA12</i>             | 3  | OFF | ND                       |          |     |
| S5611    | 4  | <i>modA12</i>             | 3  | OFF | ND                       |          |     |
| 154      | 4  | <i>modA12</i>             | 3  | OFF | <i>modB2</i>             | 9        | ON  |
| 20       | 4  | <i>modA12</i>             | 3  | OFF | <i>modB2</i>             | 9        | ON  |
| CN100    | 1  | <i>modA12</i>             | 3  | OFF | <i>modB2</i>             | 3        | ON  |
| 371      | 6  | <i>modA12</i>             | 3  | OFF | ND                       |          |     |
| DK 353   | 1  | <i>modA11</i>             | 16 | ON  | <i>modB1</i>             | 10       | OFF |
| NG 6/88  | 21 | <i>modA11</i>             | 29 | OFF | ND                       |          |     |
| EG 328   | 1  | <i>modA12</i>             | 29 | OFF | ND                       |          |     |
| NG G40   | 37 | <i>modA11</i>             | 16 | ON  | <i>modB1</i>             | 9 GCCAA  |     |
| BZ 147   | 13 | <i>modA12</i>             | 7  | ON  | <i>modB1</i>             | 4        | OFF |
| 528      | 18 | <i>modA12</i>             | 9  | OFF | ND                       |          |     |
| EG 011   | 25 | <i>modA11</i>             | 11 | OFF | ND                       |          |     |
| 79126    | 48 | <i>modA12</i>             | 3  | OFF | ND                       |          |     |
| NG 080   | 18 | <i>modA11<sup>h</sup></i> | 24 | OFF | <i>modB1<sup>g</sup></i> | ND       |     |
| 243      | 36 | <i>modA12</i>             | 3  | OFF | ND                       |          |     |
| MA-5756  | 3  | <i>modA12</i>             | 11 | OFF | ND                       |          |     |
| M597     | 32 | <i>modA12</i>             | 19 | ON  | ND                       |          |     |
| BRAZ10   | 4  | <i>modA12</i>             | 3  | OFF | <i>modB2</i>             | 7        | OFF |
| 92001    | 11 | <i>modA12</i>             | 10 | ON  | <i>modB2</i>             | 8        |     |
| 6748     | 11 | <i>modA12</i>             | 2  | OFF | <i>modB2</i>             | 3        |     |
| D1       | 11 | <i>modA12</i>             | 19 | ON  | ND                       |          |     |
| 90/18311 | 7  | <i>modA12</i>             | 11 | OFF | ND                       |          |     |
| BZ 163   | 1  | <i>modA12</i>             | 22 | ON  | <i>modB2</i>             | ND       |     |
| NG H41   | 11 | <i>modA12</i>             | 12 | OFF | <i>modB2</i>             | 16       | OFF |
| NG F26   | 11 | <i>modA11</i>             | 17 | OFF | <i>modB1</i>             | 9        | ON  |
| NG E28   | 9  | <i>modA18<sup>f</sup></i> | 18 | OFF | ND                       |          |     |
| 80049    | 27 | <i>modA12</i>             | 24 | OFF | <i>modB2</i>             | 7        | OFF |
| NG H36   | 14 | <i>modA12</i>             | 23 | OFF | <i>modB1</i>             | ND       |     |
| 139M     | 26 | <i>modA12</i>             | 3  | OFF | <i>modB2</i>             | 4        | OFF |
| H1964    | 5  | <i>modA12</i>             | 3  | OFF | ND                       |          |     |
| SWZ107   | 47 | <i>modA11</i>             | 11 | OFF | <i>modB1</i>             | 11       | OFF |
| EG 327   | 1  | <i>modA12</i>             | 12 | OFF | <i>modB1</i>             | 38 GCCAA | OFF |
| NG H15   | 5  | <i>modA12</i>             | 26 | OFF | <i>modB2</i>             | 8        | OFF |
| 79128    | 35 | <i>modA12</i>             | 3  | OFF | ND                       |          |     |
| BZ 232   | 19 | <i>ModA4<sup>e</sup></i>  | 15 | OFF | <i>modB1</i>             | 6 GCCAA  | ON  |
| DK 24    | 43 | <i>modA12</i>             | 11 | OFF | ND                       |          |     |
| A4/M1027 | 3  | <i>modA12</i>             | 3  | OFF | ND                       |          |     |
| NG E30   | 38 | <i>modA12</i>             | 20 | OFF | <i>modB1</i>             | 7 GCCAA  | OFF |
| 690      | 16 | <i>modA12</i>             | 4  | ON  | ND                       |          |     |
| S4355    | 4  | <i>modA12</i>             | 3  | OFF | <i>modB2</i>             | 10       | OFF |
| 38VI     | 44 | <i>modA12</i>             | 3  | OFF | ND                       |          |     |
| 106      | 4  | <i>modA12</i>             | 3  | OFF | <i>modB2</i>             | 3        | OFF |
| 196/87   | 5  | <i>modA11</i>             | 24 | OFF | ND                       |          |     |
| 322/85   | 11 | <i>modA12</i>             | 3  | OFF | ND                       |          |     |
| 255      | 1  | <i>modA12</i>             | 3  | OFF | ND                       |          |     |

|          |    |                           |    |     |                          |          |     |
|----------|----|---------------------------|----|-----|--------------------------|----------|-----|
| 254      | 32 | <i>modA12</i>             | 3  | OFF | <i>modB2</i>             | 8        | OFF |
| S3131    | 2  | <i>modA12</i>             | 3  | OFF | ND                       |          |     |
| NG E31   | 4  | <i>modA12</i>             | 3  | OFF | ND                       |          |     |
| NG 4/88  | 1  | <i>modA12</i>             | 24 | OFF | <i>modB2</i>             | 6        | ON  |
| IAL2229  | 4  | <i>modA12</i>             | 3  | OFF | ND                       |          |     |
| NG H38   | 15 | <i>modA11</i>             | 11 | OFF | <i>modB2</i>             | 17 GCCAA | OFF |
| EG 329   | 30 | <i>modA11<sup>h</sup></i> | 26 | OFF | <i>modB1<sup>g</sup></i> | ND       |     |
| NG144/82 | 5  | <i>modA11<sup>h</sup></i> | 18 | OFF | <i>modB1<sup>g</sup></i> | ND       |     |
| BZ 83    | 36 | <i>modA11<sup>h</sup></i> | 18 | OFF | <i>modB1</i>             | 4        | OFF |
| 1014     | 32 | <i>modA12</i>             | 3  | OFF | ND                       |          |     |
| 120M     | 32 | <i>modA12</i>             | 3  | OFF | ND                       |          |     |
| 393      | 34 | <i>modA12</i>             | 3  | OFF | ND                       |          |     |
| BZ 133   | 4  | <i>modA12</i>             | 3  | OFF | <i>modB1</i>             | 3        | OFF |
| 10       | 1  | <i>modA12</i>             | 3  | OFF | ND                       |          |     |
| 11-004   | 1  | <i>modA12</i>             | 3  | OFF | ND                       |          |     |
| F1576    | 1  | <i>modA12</i>             | 3  | OFF | ND                       |          |     |
| 129E     | 4  | <i>modA12</i>             | 3  | OFF | ND                       |          |     |
| NG 3/88  | 12 | <i>modA12</i>             | 14 | OFF | <i>modB1<sup>g</sup></i> | 4        | OFF |

<sup>a</sup> Genome strains

<sup>b</sup> Number and expression state of repeats within the *ModA11* or *ModB1* gene; in-frame (ON) or out-of-frame (OFF)

<sup>c</sup> Repeats can be either CCCAA, GCCAA or TCCAA

<sup>d</sup> A strain was defined as having the *modA11* allele if the DNA recognition region was  $\geq 95\%$  identical at the nucleotide level to *modA11* gene of *N. meningitidis* strain MC58 (NMB1375; see Figure 1). A strain was defined as having the *modB2* allele if the DNA recognition region was  $\geq 95\%$  identical at the nucleotide level to *modB2* gene of *N. meningitidis* strain Z2491 (NMA1467; see Figure 1)

<sup>e</sup> Strain defined as having *modA4* or *modA15* allele as defined in Fox *et al.* 2007 [17]

<sup>f</sup> Strain has a new allele henceforth defined as *modA18* in this paper. Shares similarity to *H. influenzae* strain 2019

<sup>g</sup> *modB1* strains that contain a premature stop codon

<sup>h</sup> Frame shift mutation in *res* at nucleotide 2093

ND: not determined

Refer to Figure 1 and to the text.
