# Supplementary material for: Phasevarions Mediate Random Switching of Gene Expression in Pathogenic Neisseria
Source: PLoS Pathog. 2009 Apr 24;5(4):e1000400. doi: 10.1371/journal.ppat.1000400 (PMC2667262; doi:10.1371/journal.ppat.1000400)
Supplement: Table S7 — Primers used to synthesize probes for Southern analysis, mod allele study, and sequencing plasmid pCmGFP. aQRT-PCR primers used for N. meningitidismodA11 study. bQRT-PCR Primers used for N. meningitidismodA12 and N. gonorrhoeaemodA12 study. cQRT-PCR primers used for N. gonorrhoeaemodA13 study. QRT-PCR primers are named after their TIGR gene ID. (0.06 MB PDF) [file ppat.1000400.s015.pdf]

**Table S7. Primers used to synthesize probes for Southern Analysis, *mod* allele study and sequencing plasmid pCmGFP**

| Primer                  | Sequence 5'-3'                  |
|-------------------------|---------------------------------|
| ApoI LHS1for            | AAGGTTTGAAGATACCGCACACC         |
| ApoI LHS1rev            | CTGCCGTAAGGTTTCCGTTATTC         |
| HindIII-1 for           | CGTGCTGATGGTGTGATAGTCG          |
| HindIII-1 rev           | TGGTTTTACTGAGGGGAATGTGG         |
| AluI –T for             | TCACAGTACCGACATTACGTCG          |
| AluI – T rev            | ATGAAAACACTACAAGACTGGCTCTCG     |
| ModAF                   | ATGGCGGACAAAGCACCGAAGA          |
| ModAF6Fam               | mATGGCGGACAAAGCACCGAAGA         |
| ModAR                   | TTCGCCATCTTTTTTCTCCGCTTG        |
| ModAREPEATR             | CAAAAAGCCGGTCAATTTTCATCAAA      |
| ModADRDF                | GACGCAAAAGCATTCTCAAAAT          |
| ModADRDR                | GCGTTCAACGGCAAGCGTTTC           |
| ModAF2                  | ATGAAGACAGACATTCAAACCG          |
| ModBREPEATF             | CACGCAGACAGACGTTTCAGACG         |
| ModB                    | TTCCGTCTGCGTCAAAACAGGCG         |
| REPEATR                 |                                 |
| ModBDRDF                | CTTCGCAACCTGCCGCCCCG            |
| ModBDRDR                | CGGGCGAAAAATCCTTGTC             |
| ResF                    | CTATCAATCAGTAAAAAATCAAGCG       |
| ResR                    | CAAACGCAAATGGAAAATAACGC         |
| ResEDF2:                | GCGTTATTTTCCATTTGCGTTTG         |
| ResEDR2:                | CTACTTCATTTTTTCAAGCGATGCC       |
| KanF                    | AAGCCACGTTGTGTCTC               |
| KanR                    | CTGCCTCGTGAAGAAGG               |
| 16SF                    | ACGGAGGGTGCGAGCGTTAATC          |
| 16SR                    | CTGCCTTCGCCTTCGGTATTCCT         |
| NMB0014F <sup>a</sup>   | AACCGAAATCTGGCCCAAC             |
| NMB0014R <sup>a</sup>   | CAACGATTTTTCCGACAGCC            |
| NMB0144F <sup>a</sup>   | CTGCTGTTTCGGCGTTCAAG            |
| NMB0144R <sup>a</sup>   | TCGCTGCGACGACCTAAAGT            |
| NMB0148F <sup>a</sup>   | ATGCTTCGGTTGGTCGAGTG            |
| NMB0148R <sup>a</sup>   | TTACCGATAACCACACCCCG            |
| NMB0155F <sup>a</sup>   | GAGGAAGAGCGTTTTGAGGCT           |
| NMB0155R <sup>a</sup>   | CTGTCAAAGCACAAACGACGAC          |
| NMB1540F <sup>a</sup>   | GCTTCGGTTACGATGCTTCC            |
| NMB1540R <sup>b</sup>   | TCATCGAATCCCGTGGATTC            |
| NMB1541F <sup>a</sup>   | TTCTTATGAGGCTAGGGATGCC          |
| NMB1541R <sup>a</sup>   | CAGCTTGCCATTCAGGGTTT            |
| NMB1898F <sup>a</sup>   | CCCTATTCCGTAACGCTCGA            |
| NMB1898R <sup>a</sup>   | TGTCGTCTTTGGTCAGGCC             |
| LbpBF                   | CGGAGCGGTTTCTGCTTTTC            |
| LbpBR                   | TGTATCTGCTGCGTTTTCTGTCTC        |
| LacZ <sup>StyI</sup> +1 | GTATACCCTTGGTGATCCCGTCGTTTTACAA |
| Kan <sup>StyI</sup>     | GGTCCCTTGGCAATTCTGATTAGAAAACTC  |
| NMB1405F <sup>b</sup>   | AAACTGGCAGACGGTTCTTTTG          |
| NMB1405R <sup>b</sup>   | ACACGCAGGGATTGGAATGC            |
| NMB0951F <sup>b</sup>   | CGCCTGAAAGCACAAAGACGATAC        |

|                       |                                  |
|-----------------------|----------------------------------|
| NMB0951R <sup>b</sup> | CAAGCCGTTTTTGCCGTTG              |
| NMB1206F <sup>b</sup> | AGCTTCTGATTGGCGAGTCCA            |
| NMB1206R <sup>b</sup> | TGCTGTGGCGATGGCGGCA              |
| NMB1581F <sup>b</sup> | GAACAGCAGCAGAAACAGATTG           |
| NMB1581R <sup>b</sup> | CGGCAGGAATGGTGTCTTTGAC           |
| NMB1590F <sup>b</sup> | CGTTGCCCACAAAATGAACC             |
| NMB1590R <sup>b</sup> | CCTTGCTCGCCATCAATCAC             |
| NGO2093F <sup>b</sup> | GAGATTGACGGCTTTACCCTG            |
| NGO2093R <sup>b</sup> | TGAGGCTGCTGCTTGAAACG             |
| NGO0198F <sup>c</sup> | GCTGGCTTTATTCTACGGCG             |
| NGO0198R <sup>c</sup> | GATGCCCACCAATGTCGC               |
| NGO0372F <sup>c</sup> | ACCGGTTACGACGTGGAAGTA            |
| NGO0372R <sup>c</sup> | CCATCATCGAATCCCATTGC             |
| NGO0373F <sup>c</sup> | CTGCCGTTTATGACGGAAACA            |
| NGO0373R <sup>c</sup> | GCCAAAGGCAAAGACACTGTAA           |
| NGO0374F <sup>c</sup> | GCGATTGAGCCTGAATTGATG            |
| NGO0374R <sup>c</sup> | ATTCCTTCATGGCGTCCAAC             |
| NGO0554F <sup>c</sup> | GCTGCTTTCGGCTCTGCTTAT            |
| NGO0554R <sup>c</sup> | GGTAGGAAATCGGATTCGGC             |
| NGO0656F <sup>c</sup> | GGCACAGGCATACAGCGTAA             |
| NGO0656R <sup>c</sup> | TTCGTGTACGGATTTGACGG             |
| NGO0927F <sup>c</sup> | TCCTGAGTTGCGGCGC                 |
| NGO0927R <sup>c</sup> | CCTGTTCCCCACATATAAAGCC           |
| NGO0928F <sup>c</sup> | TCTTCGGTGACGTAAGCCG              |
| NGO0928R <sup>c</sup> | AACATACCTTTCATCGGGCG             |
| NGO0929F <sup>c</sup> | ACTTACGGCGCAAACCTCCG             |
| NGO0929R <sup>c</sup> | AGGTGCGAAGCTGCTTCC               |
| NGO1368F <sup>c</sup> | GTGCGTATTTTCGGAATATCCG           |
| NGO1368R <sup>c</sup> | AGCAGGCTGACAACGTGAATC            |
| NGO1931F <sup>c</sup> | CTTCCTGTACCACCAACTGCC            |
| NGO1931R <sup>c</sup> | GCGTGATGGTGGTCATCA               |
| NGO1581F <sup>c</sup> | CACCGTCATCATCTGTCCGA             |
| NGO1581R <sup>c</sup> | TGCAGCGCCTTGTAAGGAATC            |
| GfpUpOut              | TTCCGTATGTTGCATCACCTTCACCCTCTCC  |
| GfpDownOut            | TGTAACAGCTGCTGGGATTACACATGGCATGG |
| GfpA                  | ATCCCACAAGTTTGTGAAGTCTTAACTGC    |
| GfpB                  | TTCTTGTTGAATTAGATGG              |
| GfpC                  | TAGCTTGCATGCCTGCAGGAGG           |
| GfpD                  | AACCGTTCAGCTGGATATTACG           |
| GfpE                  | TTGCTGTATTTTCGCTCTGCCGCTCTAACTCG |
| GfpF                  | TTGAAGATGGAAGCGTTCAACTAGCAGACC   |
| GfpG                  | TAGCTTGCCTGATAGGGCTAGG           |
| GfpH                  | TTTCCATGAGCAAACCTGAAACG          |
| GfpI                  | GCGTAATCGCTGCTGTTTATCAGG         |
| GfpJ                  | TGCTCAATGCGGAACGCCCGAATATCG      |
| GfpK                  | AAGATGGAAACATTCTTGGACACAAATTGG   |
| GfpL                  | TTGTTGCTCTATGCTGGCGGCTTCGGTGC    |
| GfpM                  | TTGGAATTTGACGGTTTTTTTTGTCGGATGC  |
| GfpN                  | TTCAGCTGGATATTACGGCCTTTTTAAAGACC |
| GfpO                  | TTGAACGATGTGGGACAGTTTGTATTGC     |
| GfpW                  | TATTGCGTGTGTTTCGCCGCTTCC         |
| GfpX                  | AAGTCGCAAACCTCGGTCGGGCTGACTCG    |

|           |                                                                        |
|-----------|------------------------------------------------------------------------|
| GfpY      | AAGTGGCGCGGGAAATGCCGAAGTGTTCC                                          |
| GfpZ      | AAGCCATACTGCAAAGATTTCAAAGAAGC                                          |
| mod16.for | CATGCCATGGGCCATCATCATCATCATCATCATCATCACATGAAGAC<br>AGACATTCAAACCGAATTA |
| mod16.rev | CGCGGATCCGCGTCATTGCGCATCTTTTTTCTCCGCTTGATA                             |

<sup>a</sup> QRT-PCR Primers used for *N. meningitidis modA11* study.

<sup>b</sup> QRT-PCR Primers used for *N. meningitidis modA12* and *N. gonorrhoeae modA12* study.

<sup>c</sup> QRT-PCR Primers used for *N. gonorrhoeae modA13* study.  
QRT-PCR Primers are named after their TIGR gene ID.
